# Supplementary material for: Transformative hyaluronic acid-based active targeting supramolecular nanoplatform improves long circulation and enhances cellular uptake in cancer therapy
Source: PubMed Central journal article supplement — Acta Pharm Sin B. 2018 Nov 29;9(2):397–409. doi: 10.1016/j.apsb.2018.11.006 (PMC6437598; doi:10.1016/j.apsb.2018.11.006), 2018-11-29
Supplement: mmc1.pdf [file mmc1.pdf]

**Supplementary Information for**

**ORIGINAL ARTICLE**

**Transformative hyaluronic acid-based active targeting supramolecular nanoplatform improve long circulation and enhance cellular uptake in cancer therapy**

Lu Zhong<sup>a</sup>, Lu Xu<sup>a</sup>, Yanying Liu<sup>a</sup>, Qingsong Li<sup>a</sup>, Dongyang Zhao<sup>a</sup>, Zhenbao Li<sup>a</sup>, Huicong Zhang<sup>a</sup>, Haotian Zhang<sup>b</sup>, Qiming Kan<sup>b</sup>, Yongjun Wang<sup>a</sup>, Jin Sun<sup>a,\*</sup>, Zhonggui He<sup>a,\*</sup>

<sup>a</sup> *Department of Pharmaceutics, Wuya College of Innovation, Shenyang Pharmaceutical*

*University, Wenhua Road, Shenyang 110016, China*

<sup>b</sup> *Department of Pharmacy, Shenyang Pharmaceutical University, Wenhua Road, Shenyang*

*110016, China*

\*Corresponding authors. Tel./fax: +86 24 23986321.

E-mail addresses: hezhgui\_student@aliyun.com (Zhonggui He), sunjin@sypu.edu.cn (Jin Sun).

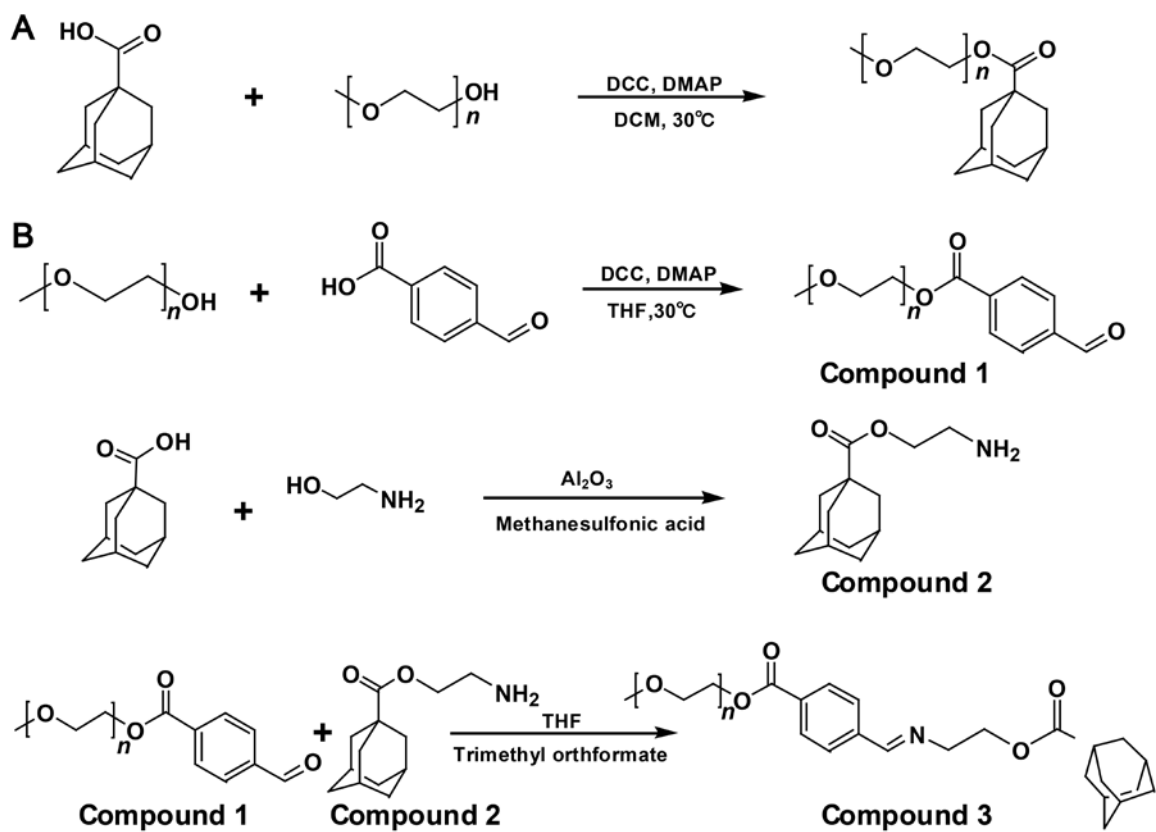

**Scheme S1.** Synthetic routes of pH sensitive AD-B-PEG (A) and non-pH sensitive AD-O-PEG (B).

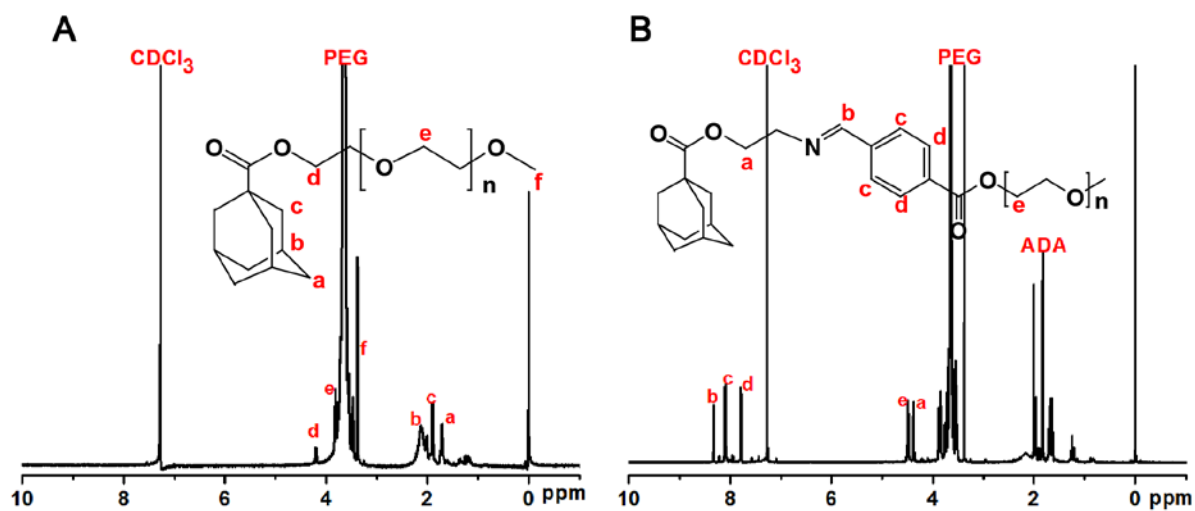

**Figure S1.**  $^1\text{H}$  NMR spectra of AD-O-PEG (A) and AD-B-PEG (B) in  $\text{CDCl}_3$ .

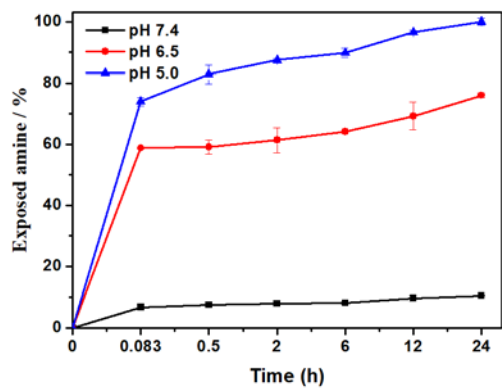

**Figure S2.** Hydrolysis of AD-B-PEG at different pH values.

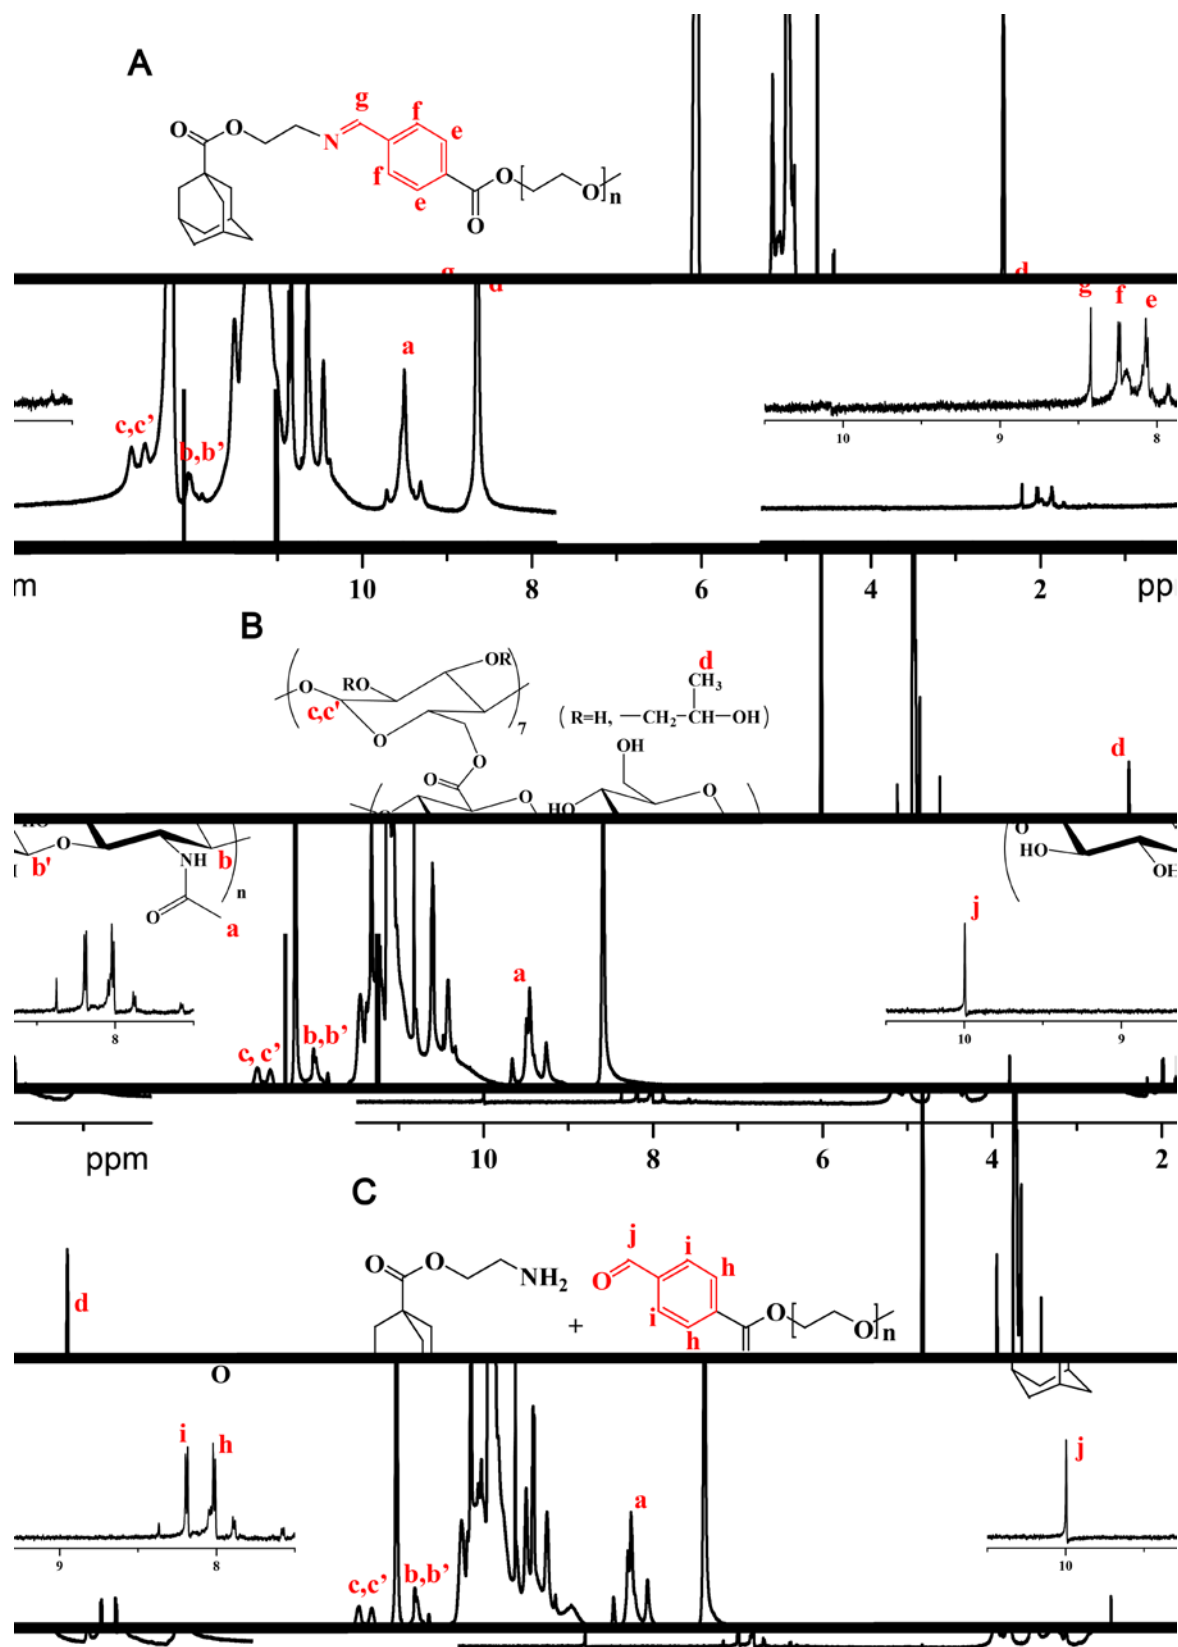

**Figure S3.**  $^1\text{H}$  NMR spectra of HCBP in  $\text{D}_2\text{O}$  at pH 7.4 (A), 6.5 (B) and 5.0 (C). The samples were analyzed after being dissolved in  $\text{D}_2\text{O}$  at the desired pH values for 30 min.

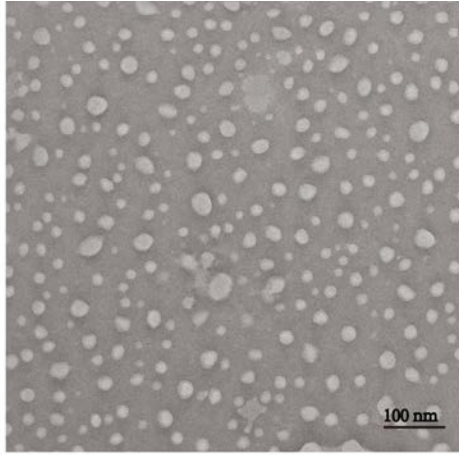

**Figure S4.** The observation of sample prepared with pH 7.4 HEPES buffer solution by TEM.

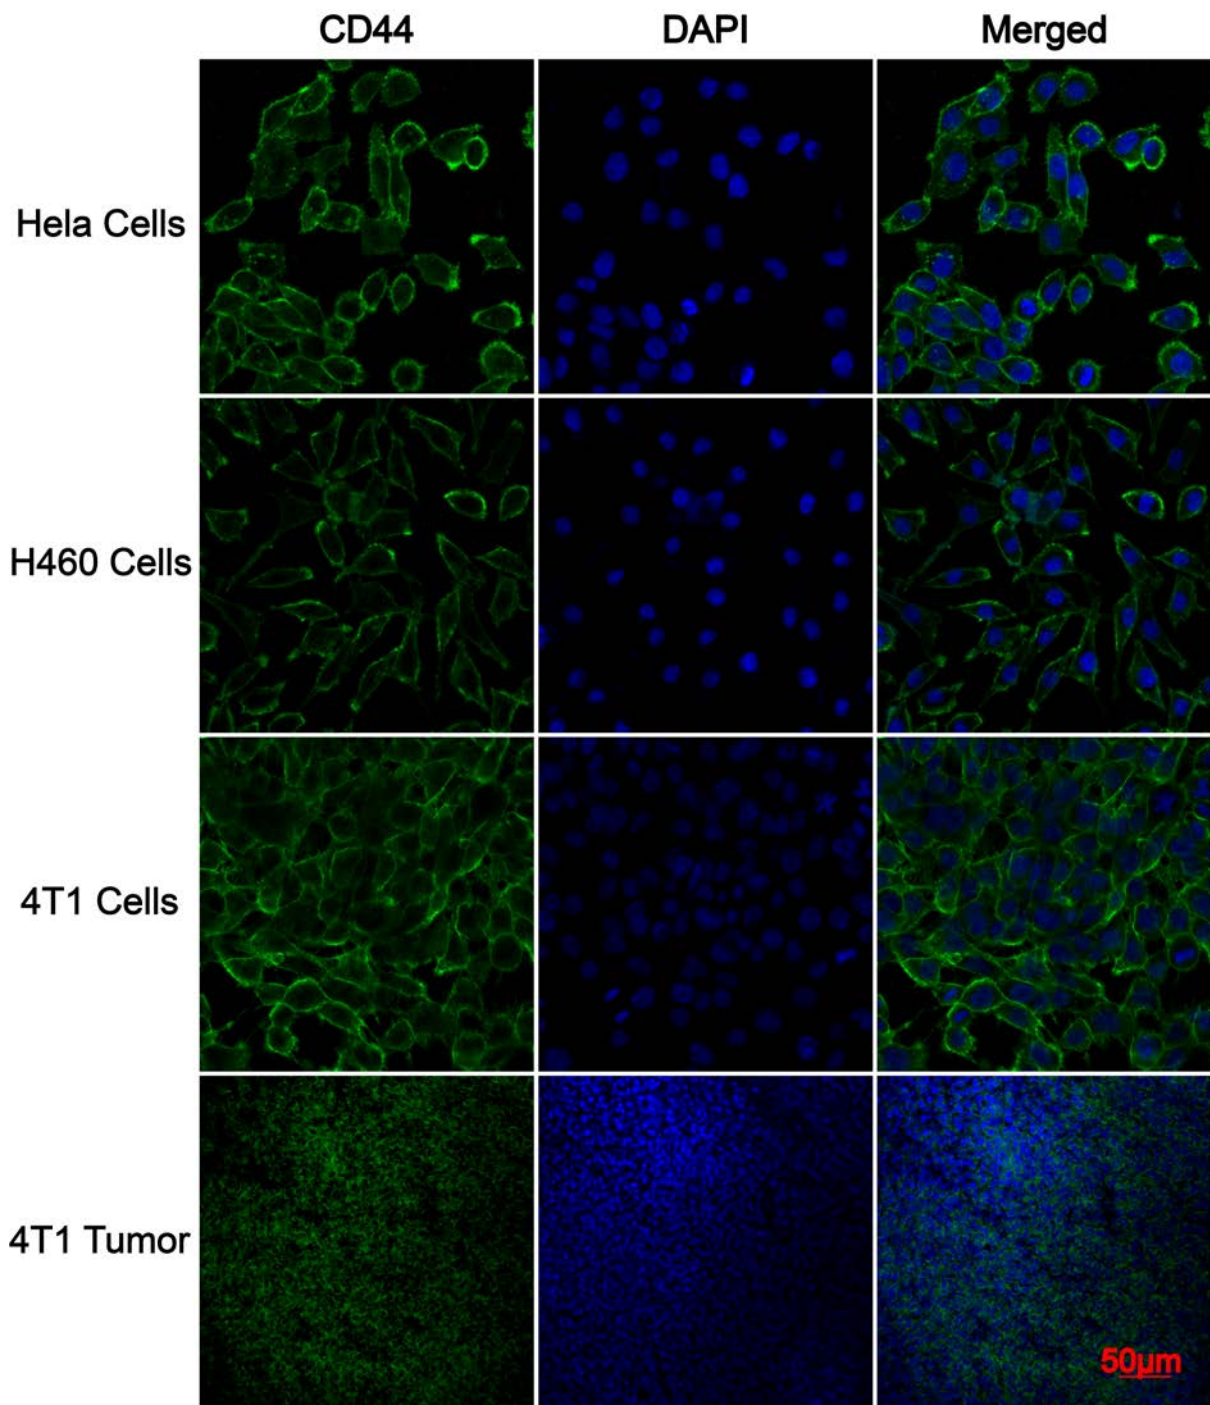

**Figure S5.** Analysis of CD44 receptor expression by immunofluorescence image with CLSM on various tumor cells and 4T1 tumor tissue.

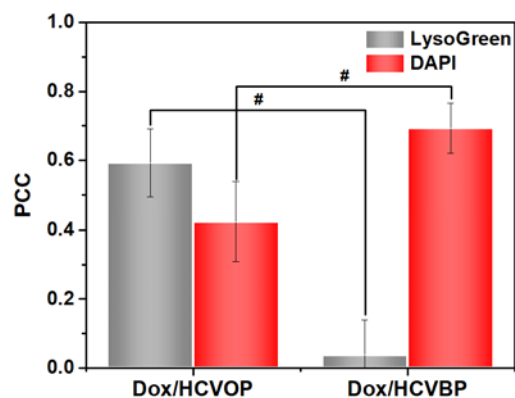

**Figure S6.** Pearson's correlation coefficient (PCC) of Dox/HCVPs comparing the overlap of Dox with LysoGreen (endo/lysosomes) and DAPI (nucleus) based on results of CLSM at 5 h.

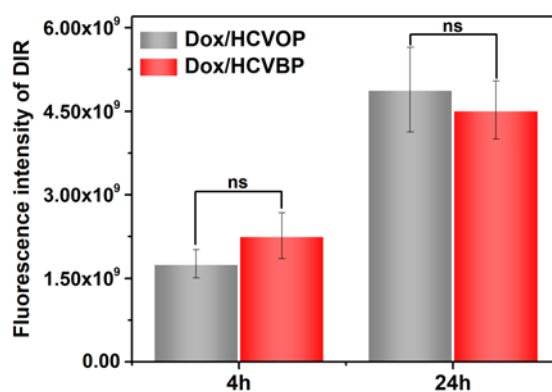

**Figure S7.** Average fluorescence intensity of DIR in tumor tissues of 4T1 bearing mice was semiquantificationally analyzed at 4 and 24 h after administrated DIR/HCVPs ( $n = 3$ ).

**Table S1.** Physiochemical and pharmaceutical characteristics of Dox/HCVPs. Data were shown as mean  $\pm$  standard deviation (mean  $\pm$  SD,  $n=3$ ).

| Nanoparticle | Size              | PDI               | zeta              | EE%              | DL%             |
|--------------|-------------------|-------------------|-------------------|------------------|-----------------|
| Dox/HCVOP    | 140.9 $\pm$ 3.329 | 0.088 $\pm$ 0.078 | -28.8 $\pm$ 0.950 | 94.25 $\pm$ 3.30 | 2.61 $\pm$ 0.13 |
| Dox/HCVBP    | 139.8 $\pm$ 3.835 | 0.109 $\pm$ 0.029 | -28.1 $\pm$ 0.379 | 93.51 $\pm$ 2.29 | 2.72 $\pm$ 0.17 |

**Table S2.** IC<sub>50</sub> values (nM) of Dox, Dox/HCVPs on HeLa and H460 cells for 48 h incubation.

| Cell | Dox    | Dox/HCVOP | Dox/HCVBP |
|------|--------|-----------|-----------|
| HeLa | 37.53  | 75.03     | 41.86     |
| H460 | 397.70 | 376.10    | 179.10    |

**Table S3.** Pharmacokinetic parameters of Dox and Dox/HCVPs in rats after a single intravenous administration at the dose of 5 mg/kg (*n* = 5).

| parameter                   | Dox              | Dox/HCVOP         | Dox/HCVBP         |
|-----------------------------|------------------|-------------------|-------------------|
| AUC <sub>0-t</sub> (μg/L·h) | 1034.722±305.868 | 4462.387±1001.992 | 3931.593±770.229  |
| AUC <sub>0-∞</sub> (μg/L·h) | 1342.99±255.282  | 6572.503±1281.028 | 5613.767±1301.930 |
| <i>t</i> <sub>1/2</sub> (h) | 29.288±3.104     | 102.368±28.611    | 101.641±14.904    |
